# Supplementary material for: Cost-effectiveness of integrated COPD care: the RECODE cluster randomised trial
Source: HighWire-hosted journal article supplement (doi:10.1136/bmjopen-2014-007284), 2015-10-01
Supplement: bmjopen-2014-007284supp.pdf [file bmjopen-2014-007284supp.pdf]

## Appendix 1. Health economic terms

### Incremental costs

= Difference in costs between the intervention and usual care group

$$= \text{Costs}_{\text{intervention group}} - \text{Costs}_{\text{usual care group}}$$

### Incremental effects

= Difference in effects between the intervention and usual care group

$$= \text{Effect}_{\text{intervention group}} - \text{Effect}_{\text{usual care group}}$$

### Incremental cost-effectiveness ratios (ICERs)

= Incremental costs / Incremental effects

$$= (\text{Costs}_{\text{intervention group}} - \text{Costs}_{\text{usual care group}}) / (\text{Effect}_{\text{intervention group}} - \text{Effect}_{\text{usual care group}})$$

### Bootstrapping

Bootstrapping means repeatedly drawing samples with replacement from the original dataset.<sup>1</sup> That is to say the same record can occur more than once in a given bootstrap sample. Each sample has the same size as the trial and for each sample the difference in costs and QALYs between RECODE and usual care and the ICER is calculated. The 2,5<sup>th</sup> and the 97,5<sup>th</sup> percentile of the 5,000 bootstrap replications form the 95% uncertainty interval of the differences in costs and QALYs.

### Cost-effectiveness plane

We plot the uncertainty around the difference in costs and effects in a cost-effectiveness plane (CE-plane). In a CE-plane, the horizontal axis displays the difference in effects and the vertical axis displays the difference in costs.<sup>2</sup> The results of the bootstrap replications fall into one of four quadrants:

- North-east quadrant: more cost and more effects;
- South-east quadrant: less cost and more effects (intervention is dominant);
- South-west quadrant: less cost and less effects;
- North-west quadrant: more cost and less effects (intervention is dominated).

In the most ideal situation, all the results of the bootstraps lay in lower-right corner of the plane, indicating lower costs and improved outcomes.

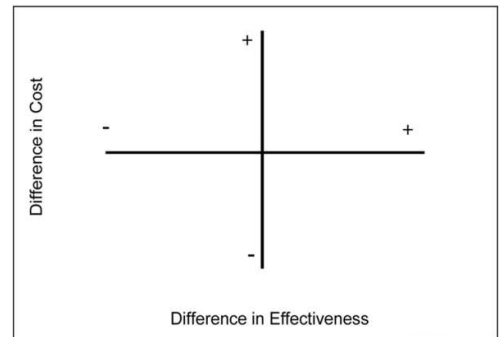

### Cost-effectiveness acceptability curves

The cost-effectiveness acceptability curve shows the probability that the RECODE program is cost-effective using different thresholds for the willingness to pay for a quality adjusted life year.<sup>3</sup> This probability equals the proportion of bootstrap replications in which the ICER is lower than the threshold value.

### References

1. Briggs AH, Wonderling DE, Mooney CZ. Pulling cost-effectiveness analysis up by its bootstraps: a non-parametric approach to confidence interval estimation. *Health Econ* 1997; 6(4): 327-40.
2. Briggs A, Fenn P. Confidence intervals or surfaces? Uncertainty on the cost-effectiveness plane. *Health Econ* 1998; 7(8): 723-40.
3. van Hout BA, Al MJ, Gordon GS, Rutten FF. Costs, effects and C/E-ratios alongside a clinical trial. *Health Econ* 1994; 3(5): 309-19.

**Appendix 2.** Sensitivity analyses: impact on cost-utility and cost-effectiveness, with intervention costs

|                                                                                       |    | Costs   |            |                            | Effect |            |                           | CE-planes      |      |     |      |     |
|---------------------------------------------------------------------------------------|----|---------|------------|----------------------------|--------|------------|---------------------------|----------------|------|-----|------|-----|
|                                                                                       |    | RECODE  | usual Care | Difference (95% CI)        | RECODE | usual Care | Difference (95% CI)       | ICER           | NW   | SW  | NE   | SE  |
| <b>With intervention costs</b>                                                        |    |         |            |                            |        |            |                           |                |      |     |      |     |
| <i>Cost per QALY</i>                                                                  | HP | € 5,528 | € 4,644    | € 883**<br>(375 – 1,353)   | 1.40   | 1.44       | -0.04*<br>(-0.07 – -0.01) | <b>-23,792</b> | 99.1 | 0.0 | 0.9  | 0.0 |
|                                                                                       | SP | € 6,211 | € 5,206    | € 1,005**<br>(381 – 1,570) | 1.40   | 1.44       | -0.04*<br>(-0.07 – -0.01) | <b>-27,053</b> | 99.0 | 0.2 | 0.9  | 0.0 |
| <i>Cost per exacerbation avoided</i>                                                  | HP | € 5,528 | € 4,644    | € 883**<br>(375 – 1,353)   | 0.78   | 0.65       | -0.14<br>(-0.30 – 0.06)   | <b>-6,373</b>  | 92.5 | 0.0 | 7.5  | 0.0 |
|                                                                                       | SP | € 6,211 | € 5,206    | € 1,005**<br>(381 – 1,570) | 0.78   | 0.65       | -0.14<br>(-0.30 – 0.06)   | <b>-7,247</b>  | 92.4 | 0.2 | 7.5  | 0.0 |
| <i>Cost per additional patient with a clinical relevant improvement in CCQ score</i>  | HP | € 5,528 | € 4,644    | € 883**<br>(375 – 1,353)   | 0.11   | 0.12       | -0.02<br>(-0.06 – 0.02)   | <b>-54,139</b> | 76.2 | 0.0 | 23.8 | 0.0 |
|                                                                                       | SP | € 6,211 | € 5,206    | € 1,005**<br>(381 – 1,570) | 0.11   | 0.12       | -0.02<br>(-0.06 – 0.02)   | <b>-61,559</b> | 76.1 | 0.1 | 23.8 | 0.0 |
| <i>Cost per additional patient with a clinical relevant improvement in SGRQ score</i> | HP | € 5,528 | € 4,644    | € 883**<br>(375 – 1,353)   | 0.26   | 0.27       | -0.01<br>(-0.07 – 0.04)   | <b>-70,388</b> | 67.4 | 0.0 | 32.6 | 0.0 |
|                                                                                       | SP | € 6,211 | € 5,206    | € 1,005**<br>(381 – 1,570) | 0.26   | 0.27       | -0.01<br>(-0.07 – 0.04)   | <b>-80,035</b> | 67.3 | 0.1 | 32.6 | 0.1 |

\* Significant ( $p < 0.05$ ), \*\* Significant ( $p < 0.01$ ), QALY=quality-adjusted life years, CCQ=Clinical COPD Questionnaire, SGRQ=St. George's Respiratory Questionnaire, HP= healthcare perspective, SP=societal perspective, CI=confidence interval, ICER=incremental cost-effectiveness ratio, NW=north-west, SW=south-west, NE=north-east, SE=south-east, CE-planes=cost-effectiveness planes.

**Appendix 3.** Sensitivity analyses: impact on cost-utility and cost-effectiveness, 12 months' time horizon

|                                                                                       |    | Costs   |            |                        | Effect |            |                            | CE-planes      |      |     |      |     |
|---------------------------------------------------------------------------------------|----|---------|------------|------------------------|--------|------------|----------------------------|----------------|------|-----|------|-----|
|                                                                                       |    | RECODE  | usual Care | Difference (95% CI)    | RECODE | usual Care | Difference (95% CI)        | ICER           | NW   | SW  | NE   | SE  |
| <b>12 months' time horizon</b>                                                        |    |         |            |                        |        |            |                            |                |      |     |      |     |
| <i>Cost per QALY</i>                                                                  | HP | € 2,622 | € 2,214    | € 408**<br>(193 – 607) | 0.71   | 0.70       | 0.01<br>(-0.001 – 0.02)    | <b>42,458</b>  | 3.6  | 0.0 | 96.4 | 0.0 |
|                                                                                       | SP | € 2,955 | € 2,585    | € 370*<br>(90 – 206)   | 0.71   | 0.70       | 0.01<br>(-0.001 – 0.02)    | <b>38,471</b>  | 3.6  | 0.0 | 95.8 | 0.6 |
| <i>Cost per exacerbation avoided</i>                                                  | HP | € 2,622 | € 2,214    | € 408**<br>(193 – 607) | 0.38   | 0.32       | -0.06<br>(-0.14 – 0.05)    | <b>-7,401</b>  | 87.3 | 0.0 | 12.7 | 0.0 |
|                                                                                       | SP | € 2,955 | € 2,585    | € 370*<br>(90 – 206)   | 0.38   | 0.32       | -0.06<br>(-0.14 – 0.05)    | <b>-6,706</b>  | 86.8 | 0.5 | 12.7 | 0.0 |
| <i>Cost per additional patient with a clinical relevant improvement in CCQ score</i>  | HP | € 2,622 | € 2,214    | € 408**<br>(193 – 607) | 0.19   | 0.26       | -0.07**<br>(-0.14 – -0.02) | <b>-5,582</b>  | 99.6 | 0.0 | 0.4  | 0.0 |
|                                                                                       | SP | € 2,955 | € 2,585    | € 370*<br>(90 – 206)   | 0.19   | 0.26       | -0.07**<br>(-0.14 – -0.02) | <b>-5,058</b>  | 99.0 | 0.6 | 0.4  | 0.0 |
| <i>Cost per additional patient with a clinical relevant improvement in SGRQ score</i> | HP | € 2,622 | € 2,214    | € 408**<br>(193 – 607) | 0.36   | 0.37       | -0.01<br>(-0.05 – 0.03)    | <b>-36,869</b> | 69.4 | 0.0 | 30.6 | 0.0 |
|                                                                                       | SP | € 2,955 | € 2,585    | € 370*<br>(90 – 206)   | 0.36   | 0.37       | -0.01<br>(-0.05 – 0.03)    | <b>-33,408</b> | 69.1 | 0.3 | 30.3 | 0.2 |

\* Significant ( $p < 0.05$ ), \*\* Significant ( $p < 0.01$ ), QALY=quality-adjusted life years, CCQ=Clinical COPD Questionnaire, SGRQ=St. George's Respiratory Questionnaire, HP= healthcare perspective, SP=societal perspective, CI=confidence interval, ICER=incremental cost-effectiveness ratio, NW=north-west, SW=south-west, NE=north-east, SE=south-east, CE-planes=cost-effectiveness planes.

**Appendix 4.** Cost-effectiveness acceptability curves, healthcare (upper) and societal perspective (lower) with a 12 months' time horizon

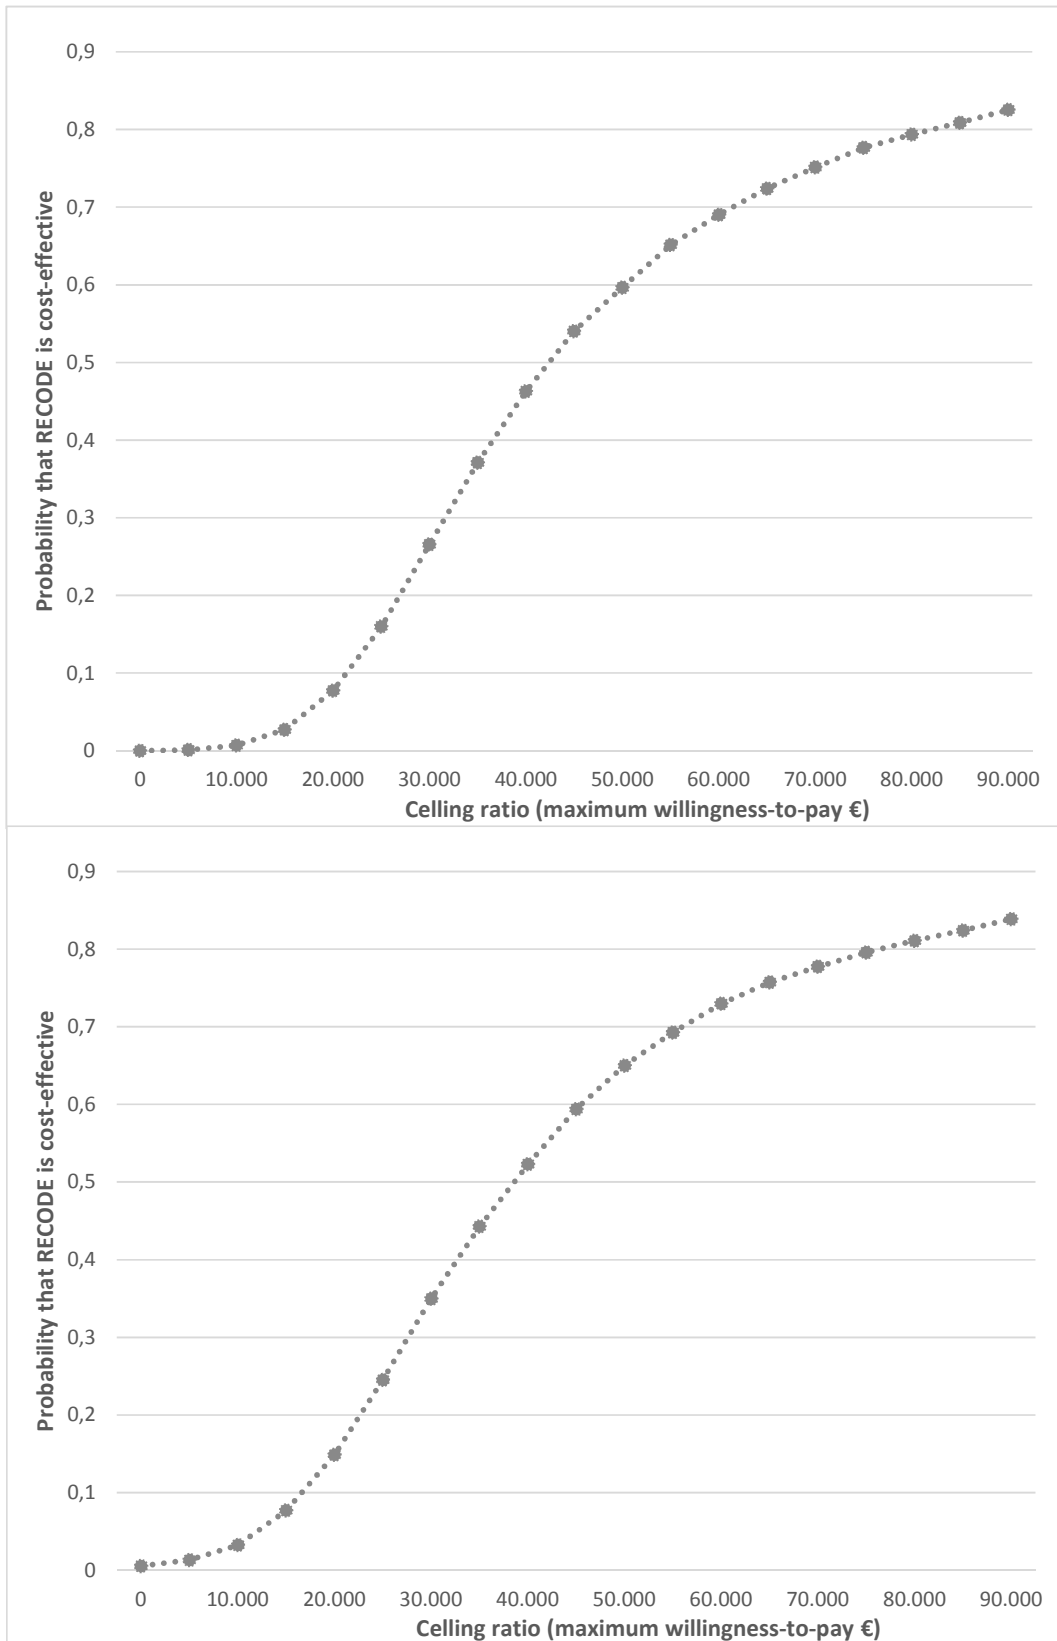

**Appendix 5. Subgroup analyses (age, gender, Medical Research Council (MRC) Dyspnoea scale)**

|                                       |           | Costs  |            |            |                           | Effect (QALY's) |            |            |                            | CE-planes |                |      |      |      |     |
|---------------------------------------|-----------|--------|------------|------------|---------------------------|-----------------|------------|------------|----------------------------|-----------|----------------|------|------|------|-----|
|                                       |           | RECODE | usual Care | Difference | P-value Interaction       | RECODE          | usual Care | Difference | P-value Interaction        | ICER      | NW             | SW   | NE   | SE   |     |
| <b>Cost per QALY age subgroups</b>    |           |        |            |            |                           |                 |            |            |                            |           |                |      |      |      |     |
| <i>HP</i>                             | <65 years | N=411  | € 3,975    | € 3,801    | € 174<br>(-434 – 711)     | 0.03*           | 1.57       | 1.58       | -0.02<br>(-0.06 – 0.03)    | 0.04*     | <b>-9,820</b>  | 58.0 | 20.4 | 15.8 | 5.9 |
|                                       | ≥65 years | N=675  | € 6,029    | € 5,028    | € 1,001*<br>(248 – 1,701) |                 | 1.55       | 1.60       | -0.05*<br>(-0.10 – -0.01)  |           | <b>-18,698</b> | 98.8 | 0.5  | 0.7  | 0.0 |
| <i>SP</i>                             | <65 years | N=411  | € 5,374    | € 5,158    | € 216<br>(-737 – 1,035)   | 0.03*           | 1.57       | 1.58       | -0.02<br>(-0.06 – 0.03)    | 0.04*     | <b>-12,171</b> | 54.1 | 24.2 | 15.1 | 6.5 |
|                                       | ≥65 years | N=675  | € 6,064    | € 5,079    | € 985*<br>(224 – 1,679)   |                 | 1.55       | 1.60       | -0.05*<br>(-0.10 – -0.01)  |           | <b>-18,409</b> | 98.7 | 0.6  | 0.7  | 0.0 |
| <b>Cost per QALY gender subgroups</b> |           |        |            |            |                           |                 |            |            |                            |           |                |      |      |      |     |
| <i>HP</i>                             | Men       | N=585  | € 4,725    | € 4,344    | € 381<br>(-250 – 963)     | 0.92            | 1.53       | 1.57       | -0.04*<br>(-0.08 – -0.01)  | 0.16      | <b>-8,951</b>  | 88.4 | 10.5 | 1.1  | 0.1 |
|                                       | Women     | N=501  | € 5,527    | € 4,756    | € 771<br>(-44 – 1,472)    |                 | 1.35       | 1.37       | -0.02<br>(-0.07 – 0.02)    |           | <b>-35,680</b> | 80.4 | 2.7  | 16.4 | 0.4 |
| <i>SP</i>                             | Men       | N=585  | € 5,226    | € 4,924    | € 302<br>(-502 – 1,000)   | 0.75            | 1.53       | 1.57       | -0.04*<br>(-0.08 – -0.01)  | 0.16      | <b>-7,090</b>  | 78.2 | 20.7 | 0.9  | 0.2 |
|                                       | Women     | N=501  | € 6,302    | € 5,331    | € 971*<br>(106 – 1,748)   |                 | 1.35       | 1.37       | -0.02<br>(-0.07 – 0.02)    |           | <b>-44,939</b> | 81.8 | 1.4  | 16.7 | 0.2 |
| <b>Cost per QALY MRC subgroups</b>    |           |        |            |            |                           |                 |            |            |                            |           |                |      |      |      |     |
| <i>HP</i>                             | MRC≤2     | N=725  | € 3,927    | € 3,500    | € 427<br>(-29 – 821)      | 0.67            | 1.57       | 1.61       | -0.04*<br>(-0.07 – -0.003) | 0.41      | <b>-11,060</b> | 99.5 | 2.9  | 1.5  | 0.1 |
|                                       | MRC>2     | N=361  | € 8,721    | € 7,231    | € 1,489<br>(-164 – 2,881) |                 | 0.66       | 0.69       | -0.04<br>(-0.10 – 0.03)    |           | <b>-42,301</b> | 81.2 | 2.8  | 15.5 | 0.5 |
| <i>SP</i>                             | MRC≤2     | N=725  | € 4,543    | € 4,101    | € 443<br>(-191 – 1,029)   | 0.52            | 1.57       | 1.61       | -0.04*<br>(-0.07 – -0.003) | 0.41      | <b>-11,464</b> | 90.8 | 7.6  | 1.3  | 0.2 |
|                                       | MRC>2     | N=361  | € 9,358    | € 7,744    | € 1,614<br>(-161 – 3,115) |                 | 0.66       | 0.69       | -0.04<br>(-0.10 – 0.03)    |           | <b>-45,846</b> | 81.0 | 3.0  | 15.5 | 0.5 |

\* Significant ( $p < 0.05$ ), \*\* Significant ( $p < 0.01$ ), QALY=quality-adjusted life years, MRC=Medical Research Council, HP= healthcare perspective, SP=societal perspective, CI=confidence interval, ICER=incremental cost-effectiveness ratio, NW=north-west, SW=south-west, NE=north-east, SE=south-east, CE-planes=cost-effectiveness planes.

### Appendix 5. Subgroup analyses (FEV1, SES)

|                                                             |                       | Costs  |            |            |                           | Effect (QALY's) |            |            |                          | CE-planes |                |      |      |     |     |
|-------------------------------------------------------------|-----------------------|--------|------------|------------|---------------------------|-----------------|------------|------------|--------------------------|-----------|----------------|------|------|-----|-----|
|                                                             |                       | RECODE | usual Care | Difference | P-value Interaction       | RECODE          | usual Care | Difference | P-value Interaction      | ICER      | NW             | SW   | NE   | SE  |     |
| <b>Cost per QALY lung function subgroups</b>                |                       |        |            |            |                           |                 |            |            |                          |           |                |      |      |     |     |
| HP                                                          | FEV1≥50               | N=674  | € 4,797    | € 4,025    | € 773**<br>(198 – 1,287)  | 0.85            | 1.47       | 1.51       | -0.04<br>(-0.07 – 0.003) | 0.15      | <b>-21,762</b> | 96.0 | 0.5  | 3.5 | 0.0 |
|                                                             | FEV1<50               | N=193  | € 7,744    | € 7,415    | € 329<br>(-1,499 – 1,837) |                 | 1.39       | 1.34       | -0.05<br>(-0.12 – 0.03)  |           | <b>-10,044</b> | 60.3 | 29.4 | 6.9 | 3.4 |
| SP                                                          | FEV1≥50               | N=674  | € 5,359    | € 4,537    | € 822*<br>(159 – 1,420)   | 0.82            | 1.47       | 1.51       | -0.04<br>(-0.07 – 0.003) | 0.15      | <b>-23,155</b> | 95.5 | 1.0  | 3.5 | 0.0 |
|                                                             | FEV1<50               | N=193  | € 8,622    | € 8,170    | € 452<br>(-1,536 – 2,139) |                 | 1.39       | 1.34       | -0.05<br>(-0.12 – 0.03)  |           | <b>-7,310</b>  | 63.3 | 26.5 | 7.2 | 3.1 |
| <b>Cost per QALY Social economic status (SES) subgroups</b> |                       |        |            |            |                           |                 |            |            |                          |           |                |      |      |     |     |
| HP                                                          | Low SES               | N=399  | € 5,124    | € 4,562    | € 562<br>(-434 – 1,423)   | 0.46            | 1.04       | 1.09       | -0.05<br>(-0.11 – 0.01)  | 0.15      | <b>-11,505</b> | 84.2 | 10.8 | 4.4 | 0.5 |
|                                                             | Moderate/<br>high SES | N=590  | € 5,347    | € 4,598    | € 749<br>(74 – 1,362)     |                 | 1.54       | 1.57       | -0.03<br>(-0.07 – 0.01)  |           | <b>-24,627</b> | 91.9 | 1.5  | 6.5 | 0.1 |
| SP                                                          | Low SES               | N=399  | € 5,534    | € 4,859    | € 675<br>(-415 – 1,632)   | 0.49            | 1.04       | 1.09       | -0.05<br>(-0.11 – 0.01)  | 0.15      | <b>-13,801</b> | 85.3 | 9.7  | 4.4 | 0.6 |
|                                                             | Moderate/<br>high SES | N=590  | € 6,089    | € 5,372    | € 717<br>(-125 – 1,459)   |                 | 1.54       | 1.57       | -0.03<br>(-0.07 – 0.01)  |           | <b>-23,560</b> | 89.1 | 4.3  | 6.2 | 0.4 |

\* Significant ( $p < 0.05$ ), \*\* Significant ( $p < 0.01$ ), QALY=quality-adjusted life years, FEV1= forced expiratory volume in 1 second, SES=Social Economic Status, HP= healthcare perspective, SP=societal perspective, CI=confidence interval, ICER=incremental cost-effectiveness ratio, NW=north-west, SW=south-west, NE=north-east, SE=south-east, CE-planes=cost-effectiveness planes.
